# Supplementary material for: Bioinspired superhydrophobic surfaces for anti-corrosion and drag reduction using additive manufacturing for marine applications
Source: Royal Society of Chemistry journal article supplement (doi:10.1039/d5ma01236h), 2026-01-01
Supplement: d5ma01236h1.pdf [file d5ma01236h1.pdf]

## Bioinspired Superhydrophobic Surfaces for Anti-Corrosion and Drag Reduction using Additive Manufacturing for Marine applications

Aaishwarika Raj Sharma, Harpreet Arora, and Harpreet Singh Grewal\*

*Surface Science and Tribology Lab, Department of Mechanical Engineering, Shiv Nadar*

*Institution of Eminence, Gautam Buddha Nagar, Uttar Pradesh- 201314, India*

\*Corresponding Author Email: [harpreet.grewal@snu.edu.in](mailto:harpreet.grewal@snu.edu.in)

### Supplementary Information

The coating exhibits high contact angles even after significant abrasion cycles due to self-regeneration ability as shown in Fig. S1 (a). Similarly, coatings demonstrated low corrosion current density of  $0.34 \mu\text{A}/\text{cm}^2$  for abraded samples, which is near to corrosion current density of fresh (without abrasion) coating ( $0.3 \mu\text{A}/\text{cm}^2$ ). Fig. S1 (b) shows potentiodynamic polarization curve of abraded sample.

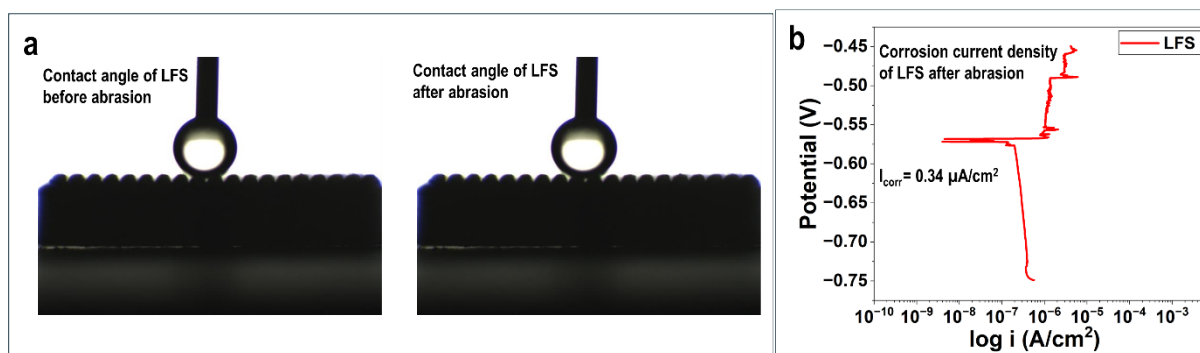

Fig. S1: (a) Contact angles before and after abrasion, (b) potentiodynamic polarization result showing coating exhibits low corrosion current density for abraded sample.
